# Supplementary material for: Ni12P5 nanoparticles bound on graphene sheets for advanced lithium–sulfur batteries
Source: Royal Society of Chemistry journal article supplement (doi:10.1039/c9nr10680d), 2020-01-01
Supplement: c9nr10680d1.pdf [file c9nr10680d1.pdf]

## Supporting Information

### **Ni<sub>12</sub>P<sub>5</sub> Nanoparticles Binding on Graphene Sheets toward Advanced Lithium–Sulfur Batteries**

Guangzeng Liu,<sup>\*,†,‡</sup> Zhengchunyu Zhang,<sup>‡</sup> Wenzhi Tian,<sup>‡</sup> Weihua Chen,<sup>&</sup> Baojuan Xi,<sup>‡</sup> Haibo Li,<sup>¶</sup> Jinkui Feng,<sup>#</sup> and Shenglin Xiong<sup>‡</sup>

<sup>†</sup> School of Chemistry and Chemistry Engineering, Qilu Normal University, Jinan, 250200, P. R. China.

<sup>‡</sup> Key Laboratory of Colloid and Interface Chemistry, Ministry of Education, School of Chemistry and Chemical Engineering, and State Key Laboratory of Crystal Materials, Shandong University, Jinan, 250100, P. R. China

<sup>&</sup> Key Laboratory of Material Processing and Mold of Ministry of Education, Zhengzhou University, Zhengzhou 450001, P. R. China

<sup>¶</sup> School of Chemistry and Chemical Engineering, Liaocheng University, Liaocheng, Shandong 252059, P. R. China

<sup>#</sup> Key Laboratory for Liquid-Solid Structural Evolution and Processing of Materials, Ministry of Education, School of Materials Science and Engineering, Shandong University, Jinan 250061, P. R. China

\*E-mail: gzliusd@163.com

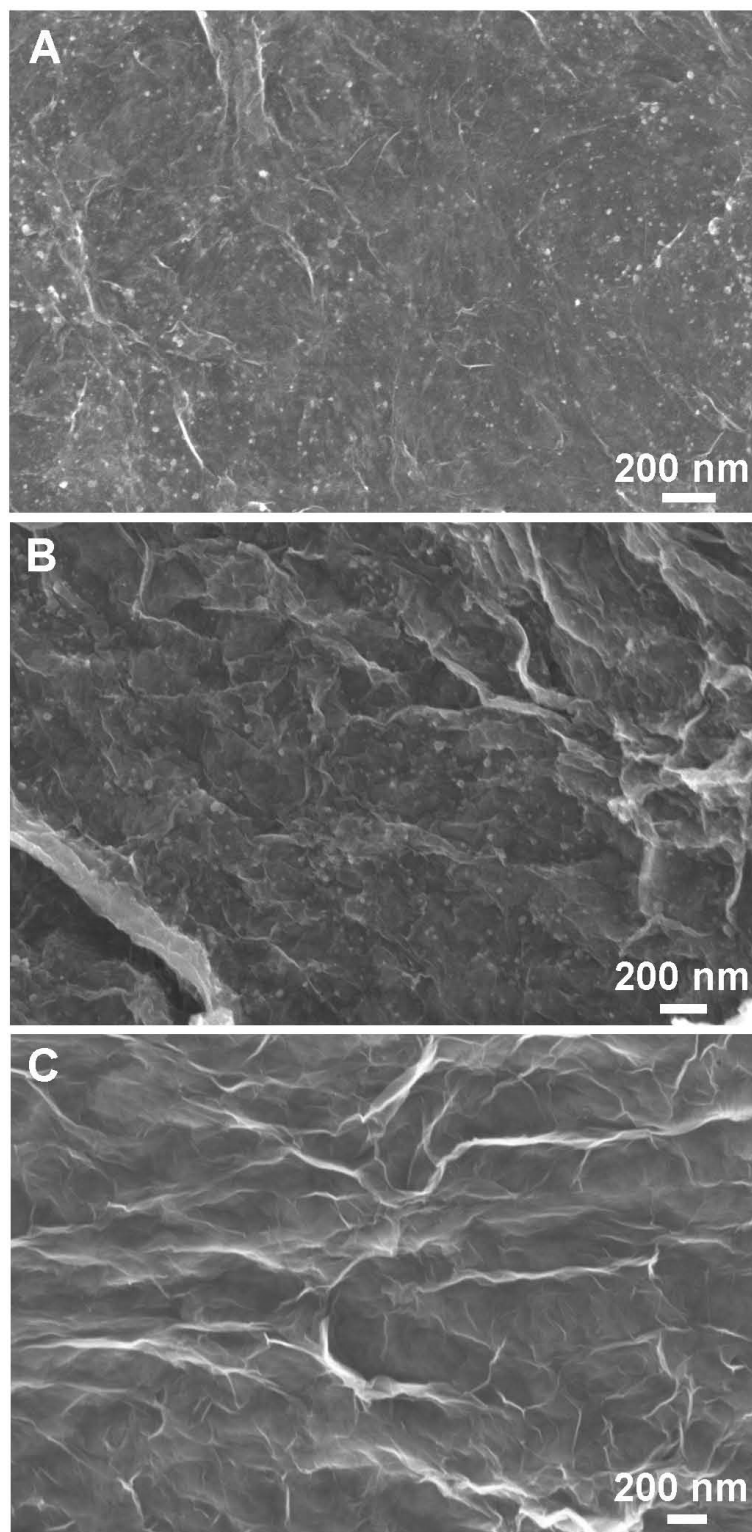

**Figure S1.** FESEM images of the precursor I (A), precursor II (B) and (C) precursor III.

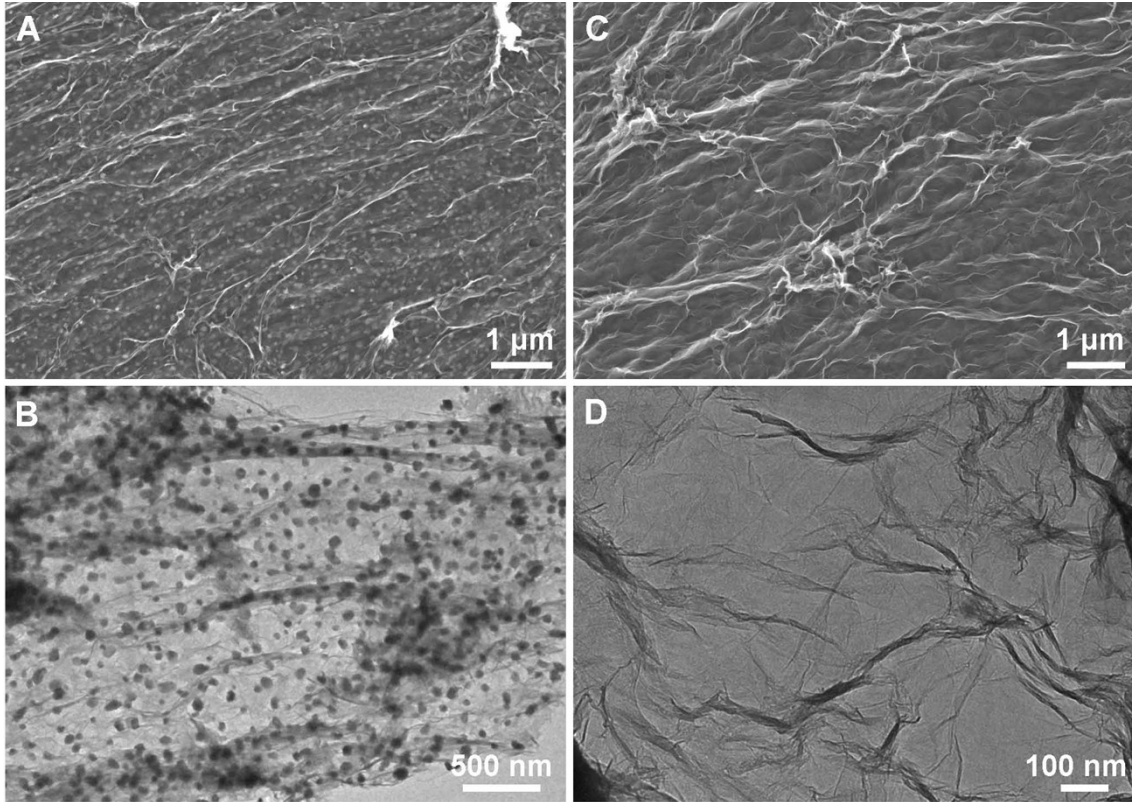

**Figure S2.** FESEM and TEM images of (A,C)  $\text{Ni}_9\text{S}_8@\text{rGO}$  and (B,D)  $\text{rGO}$ .

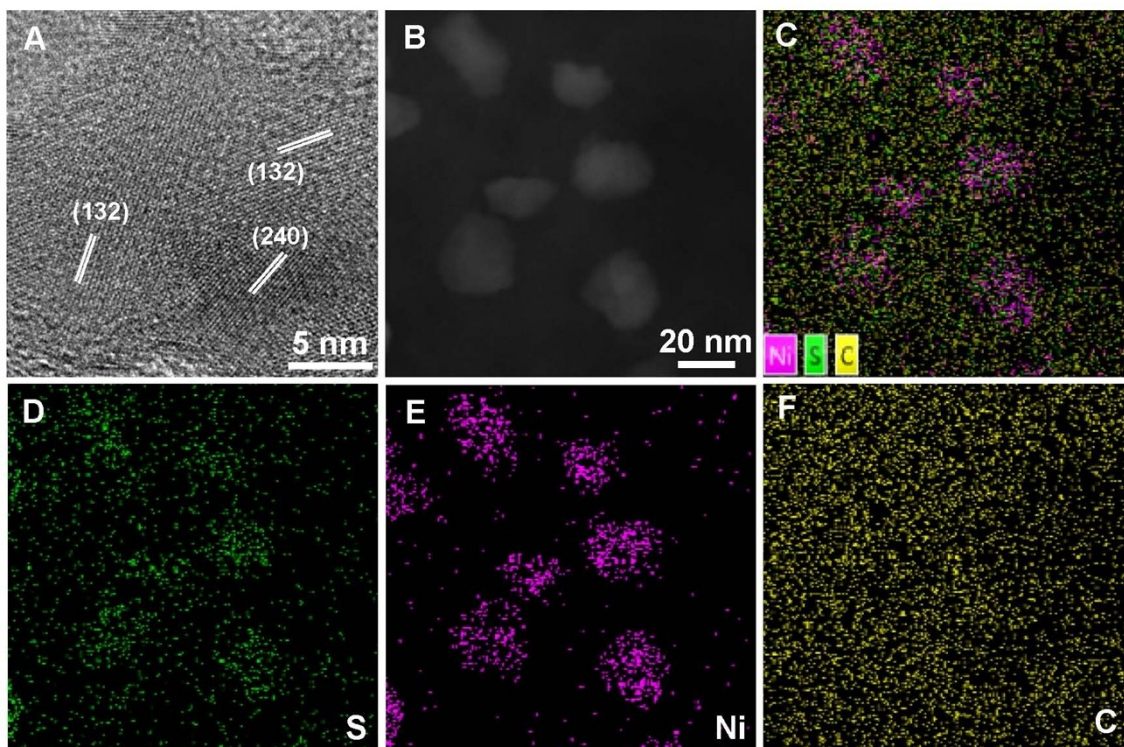

**Figure S3.** (A) HRTEM image of Ni<sub>9</sub>S<sub>8</sub>@rGO, (B) TEM image of Ni<sub>9</sub>S<sub>8</sub>@rGO nanosheets, and the corresponding mappings of (C) merged image, (D) S, (E) Ni, and (F) C.

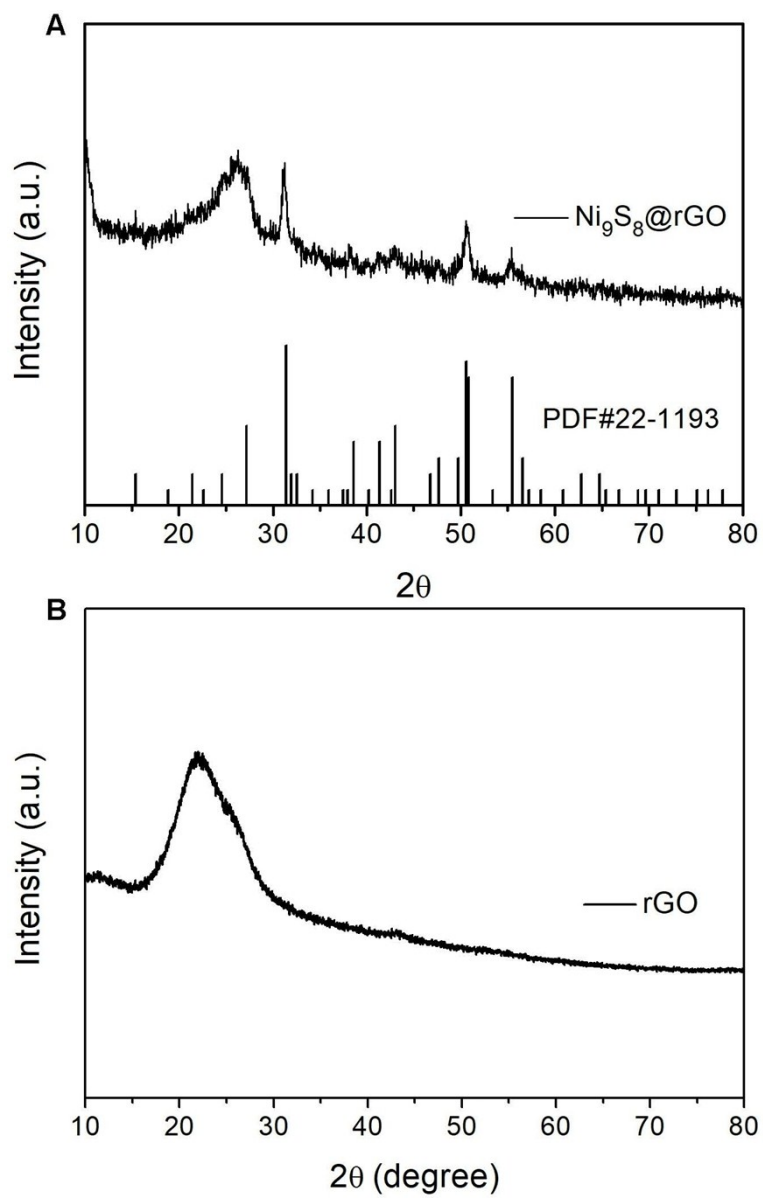

**Figure S4.** The XRD patterns of  $\text{Ni}_9\text{S}_8@\text{rGO}$  nanosheets (A) and rGO (B).

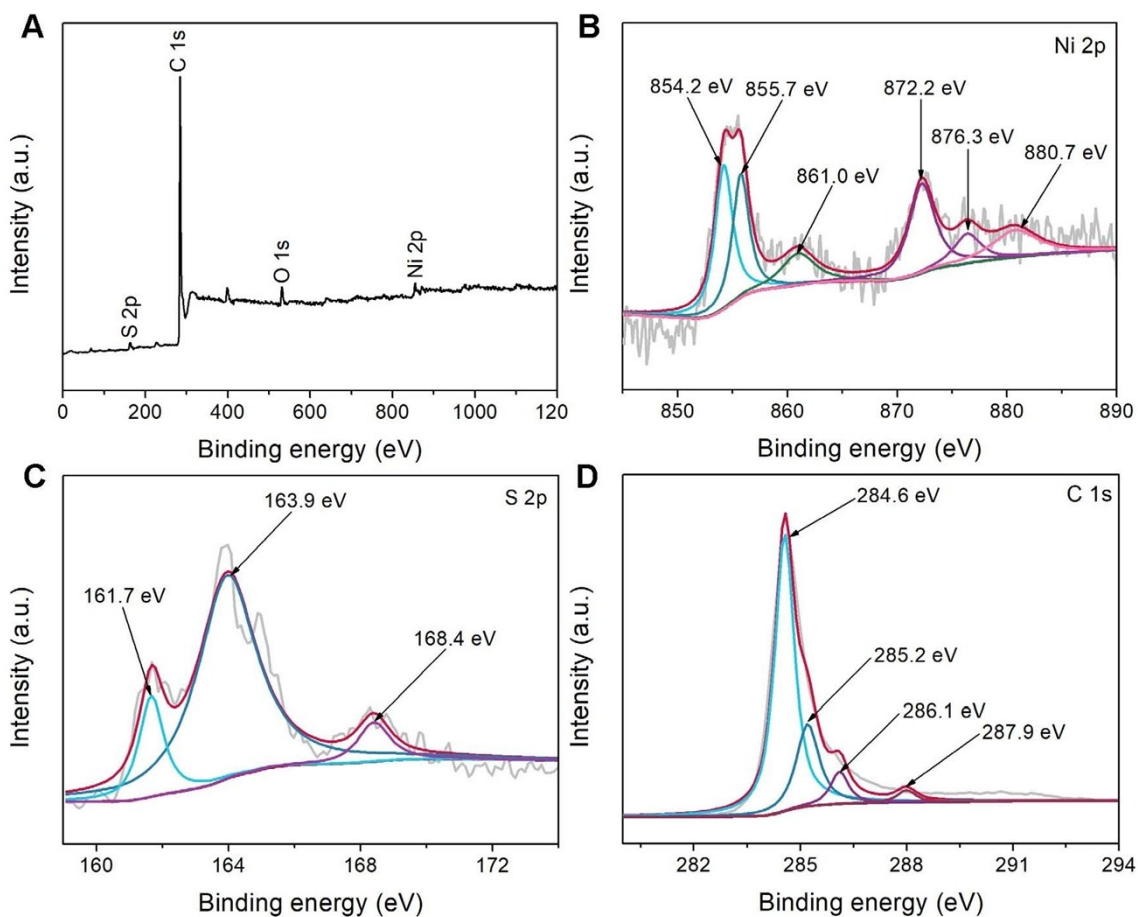

**Figure S5.** XPS spectra of Ni<sub>9</sub>S<sub>8</sub>@rGO nanosheets: (A) survey, (B-D) high-resolution spectra of Ni 2p, S 2p, and C 1s.

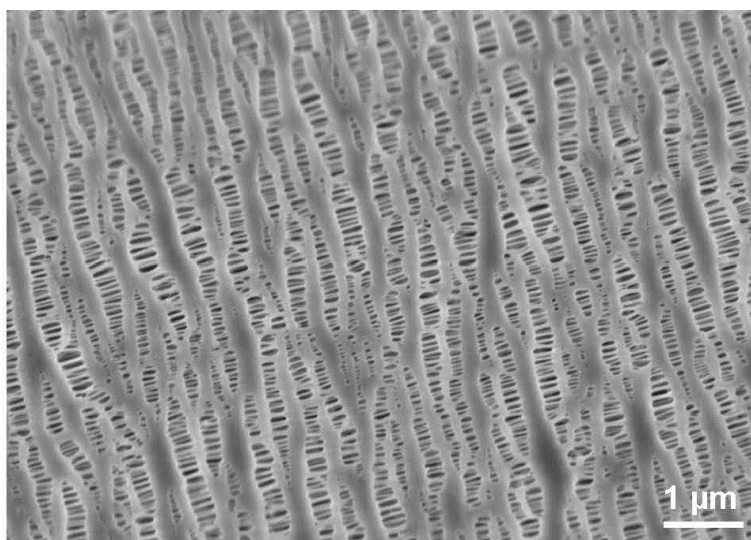

**Figure S6.** The pristine 2400 Celgard film.



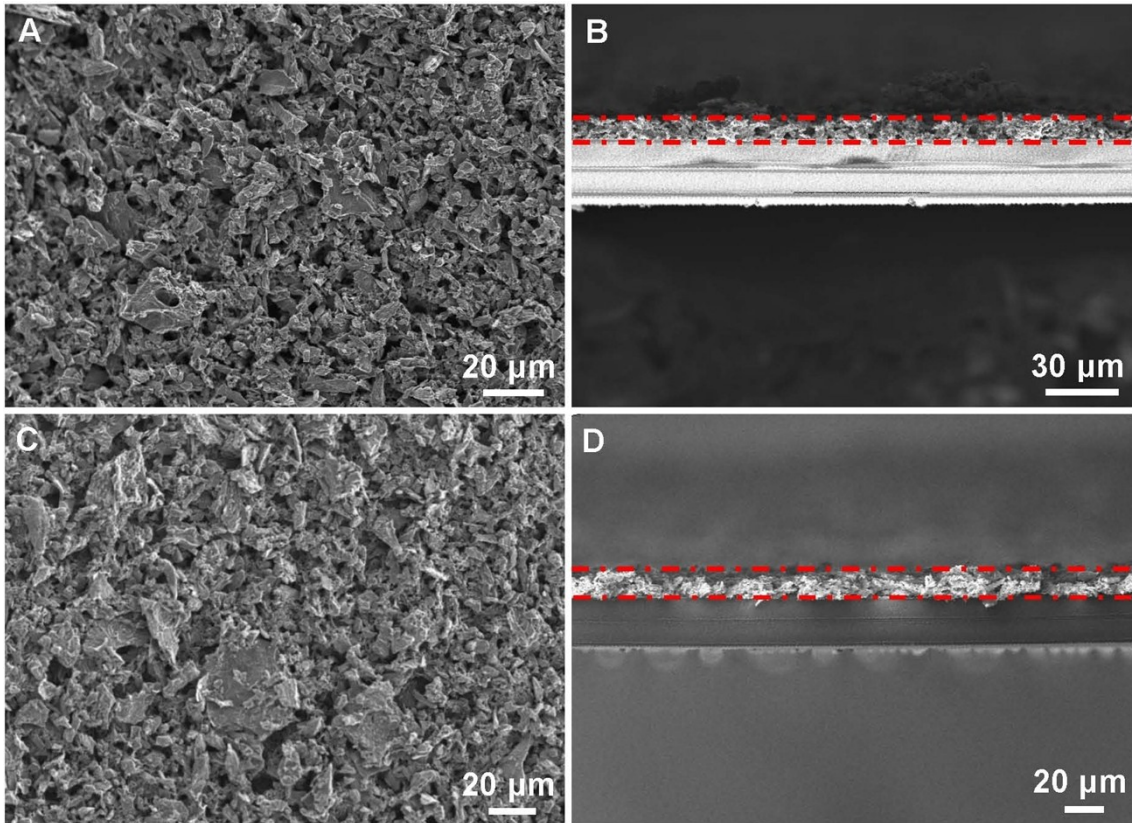

**Figure S7.** FESEM images of top surface and cross-section of (A, B)  $\text{Ni}_9\text{S}_8@\text{rGO}$ , (C, D) rGO.



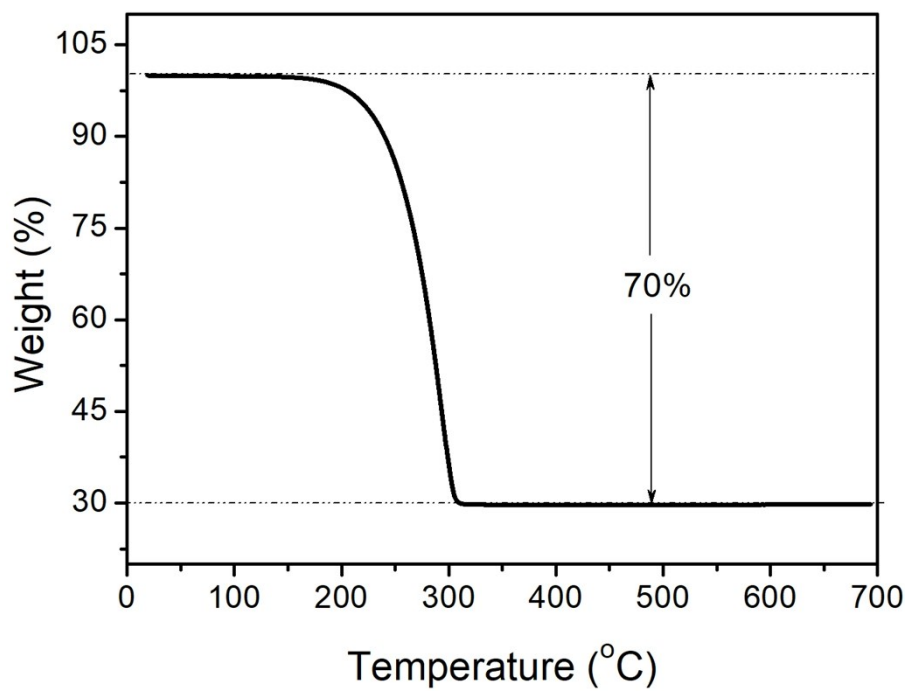

**Figure S8.** The TGA curve of the composite of sulfur and acetylene black in nitrogen atmosphere.

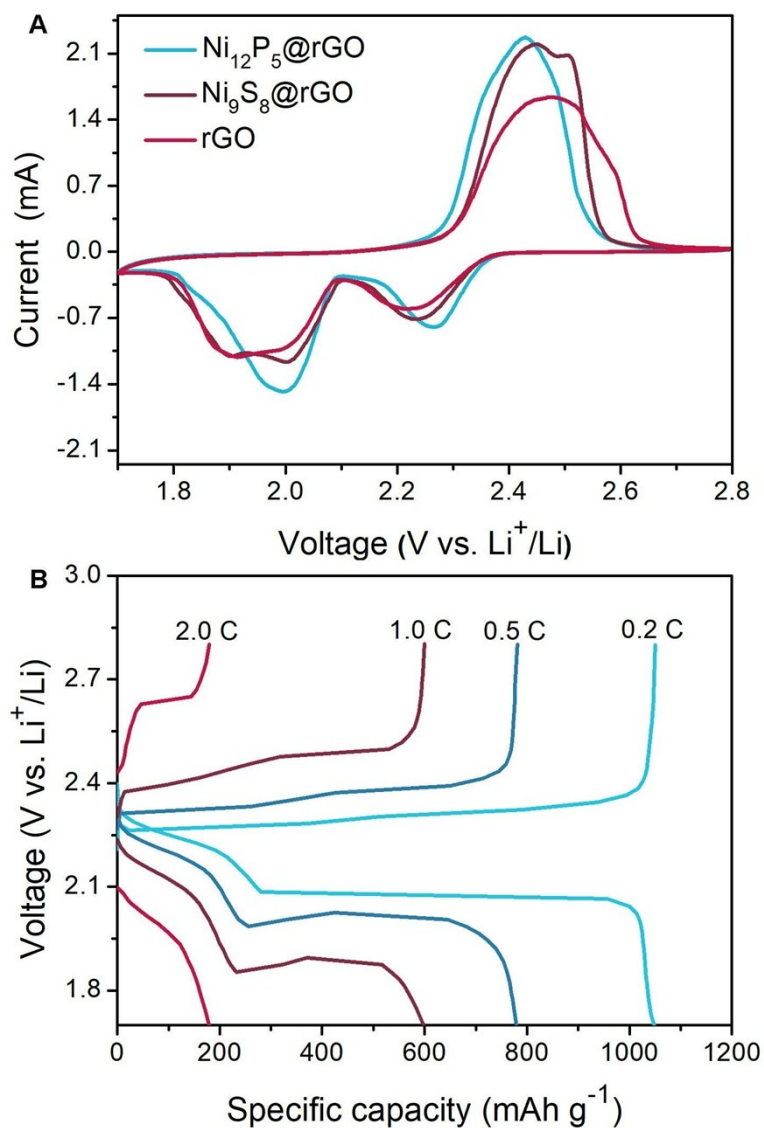

**Figure S9.** (A) The CV curves for the third cycle of cells with Ni<sub>12</sub>P<sub>5</sub>@rGO, Ni<sub>9</sub>S<sub>8</sub>@rGO and rGO separators at the scan rate of 0.1 mV s<sup>-1</sup>, (B) the galvanostatic charge/discharge voltage curves at different current densities of the cell with the pristine separator.

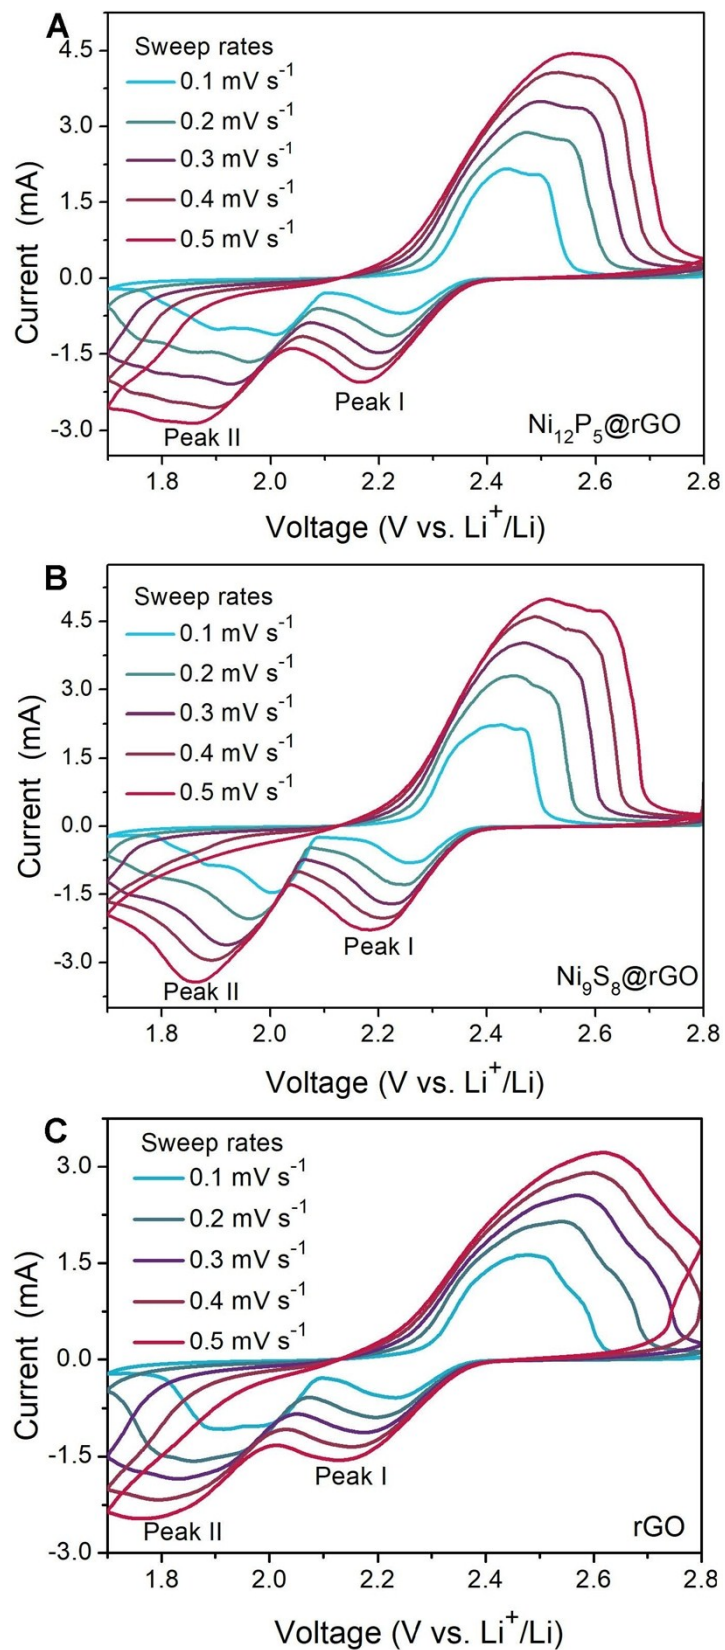

**Figure S10.** The CV curves at different sweep rates of (A)  $\text{S}/\text{Ni}_{12}\text{P}_5@\text{rGO}$ , (B)

S//Ni<sub>9</sub>S<sub>8</sub>@rGO and (C) S//rGO.

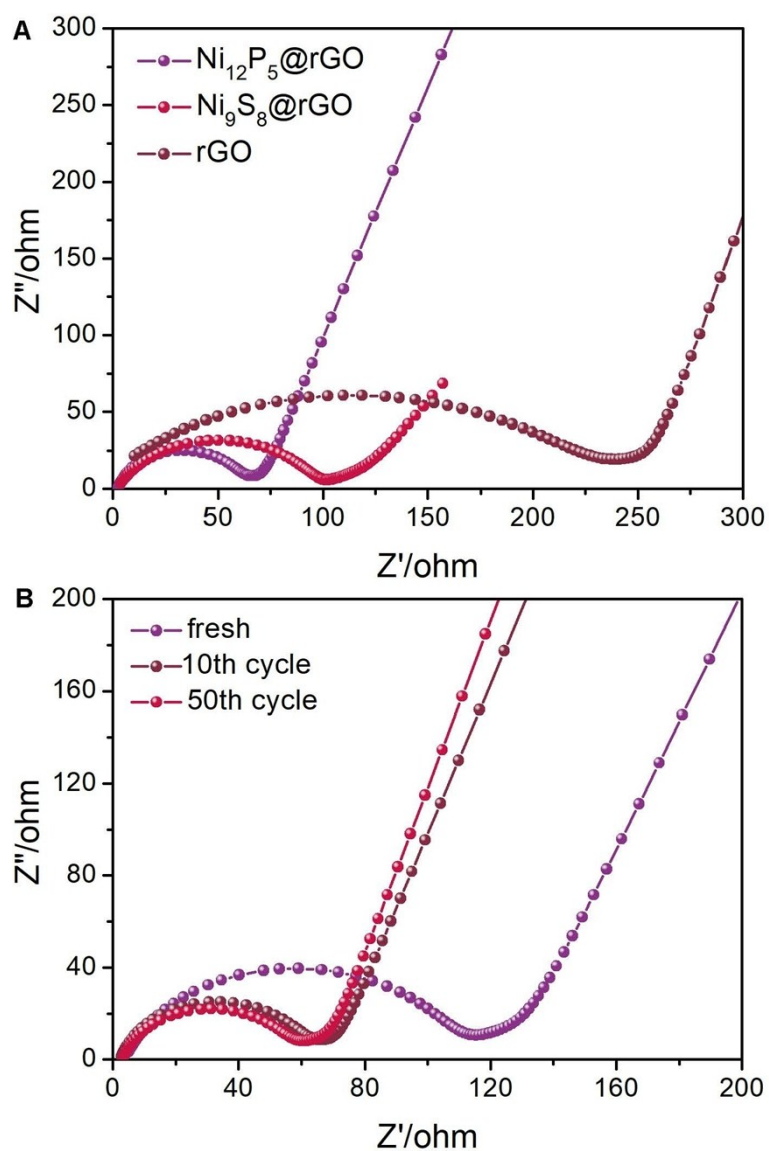

**Figure S11.** (A) The electrochemical impedance spectra (EIS) of S//Ni<sub>12</sub>P<sub>5</sub>@rGO, S//Ni<sub>9</sub>S<sub>8</sub>@rGO and S//rGO cells after 10 cycles at 0.5 C. (B) The EIS of the S//Ni<sub>12</sub>P<sub>5</sub>@rGO cell after different discharge/charge cycles at 0.5 C.

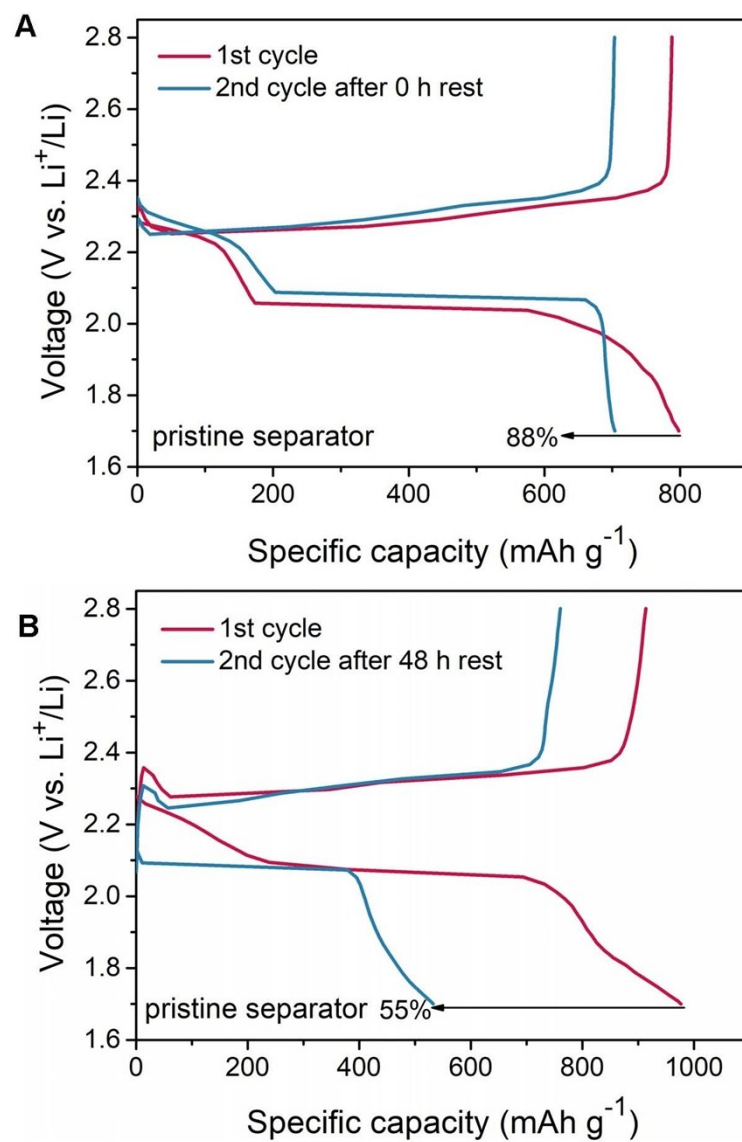

**Figure S12.** The discharge/charge curves of S//pristine separator cell at 0.2 C: (A) rest for 0 h, (B) rest for 48 h.

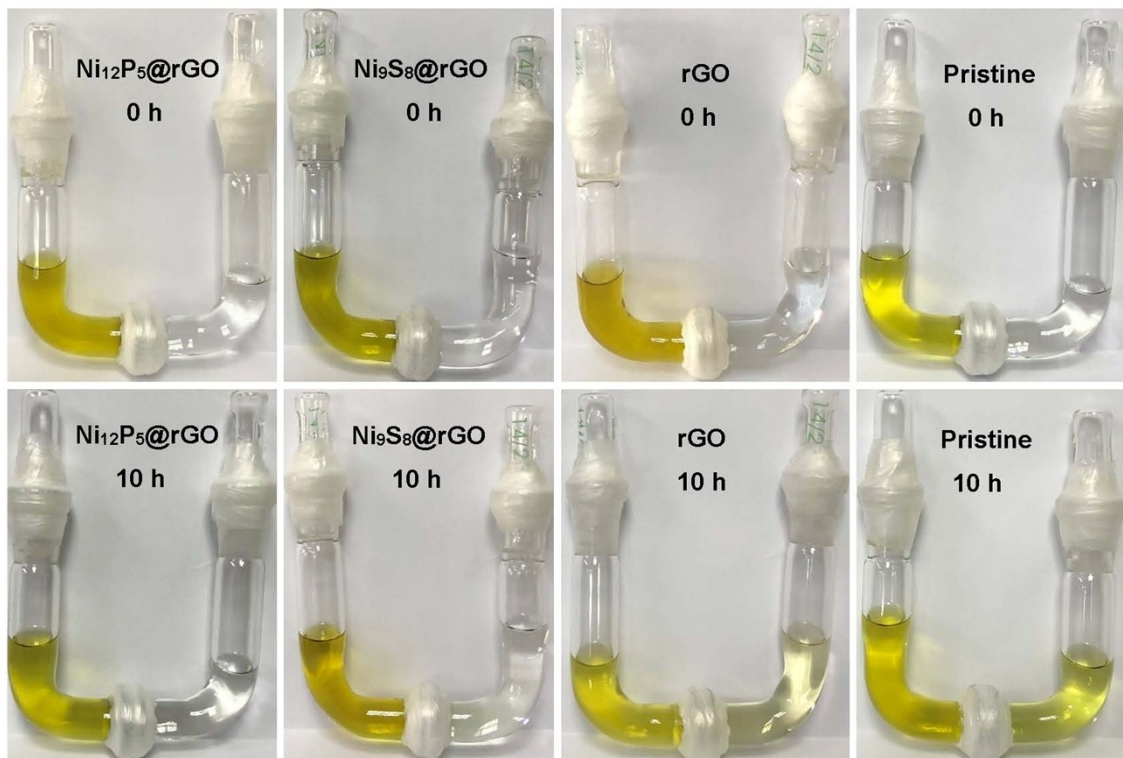

**Figure S13.** The  $\text{Li}_2\text{S}_6$  permeability experiments of different functional separators.
